# Supplementary material for: High field electroformation of sodium bismuth titanate and its solid solutions with barium titanate
Source: Royal Society of Chemistry journal article supplement (doi:10.1039/d0tc05728b), 2021-01-01
Supplement: d0tc05728b1.pdf [file d0tc05728b1.pdf]

## Electronic Supplementary Information

### High field electroformation of sodium bismuth titanate and its solid solutions with barium titanate

Pengrong Ren<sup>1,2,\*\*</sup>, Maximilian Gehringer<sup>2</sup>, Binxiang Huang<sup>3</sup>, An-Phuc Hoang<sup>2</sup>, Andreas Klein<sup>3</sup>, Till Frömling<sup>2,\*</sup>

<sup>1</sup>Shaanxi Province Key Laboratory for Electrical Materials and Infiltration Technology, School of Materials Science and Engineering, Xi'an University of Technology, Xi'an 710048, P. R. China

<sup>2</sup>Department of Materials and Earth Science, Technical University of Darmstadt, FG Nichtmetallisch-Anorganische Werkstoffe, Alarich-Weiss-Straße 2, 64287 Darmstadt, Germany

<sup>3</sup>Department of Materials and Earth Science, Technical University of Darmstadt, FG Elektronenstruktur von Materialien, Otto-Berndt-Str. 3, 64287 Darmstadt, Germany

\*Corresponding author, E-mail: [froemling@ceramics.tu-darmstadt.de](mailto:froemling@ceramics.tu-darmstadt.de),

\*\*Corresponding author, E-mail: [renpengrongxaut@126.com](mailto:renpengrongxaut@126.com)

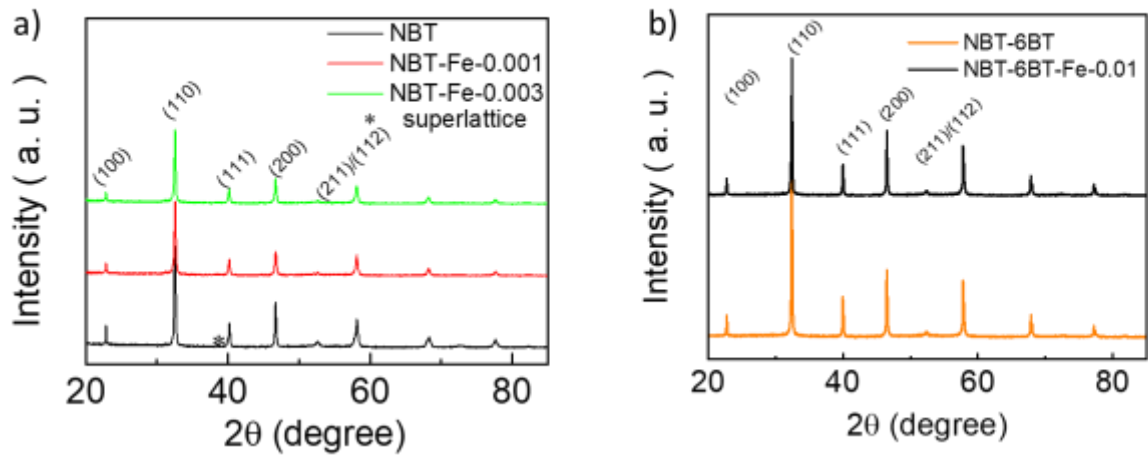

**Fig. S1.** XRD data from NBT-based materials. a) Fe-doped NBT; \*illustrates superlattice reflection<sup>1,2</sup> b) Fe-doped NBT-BT

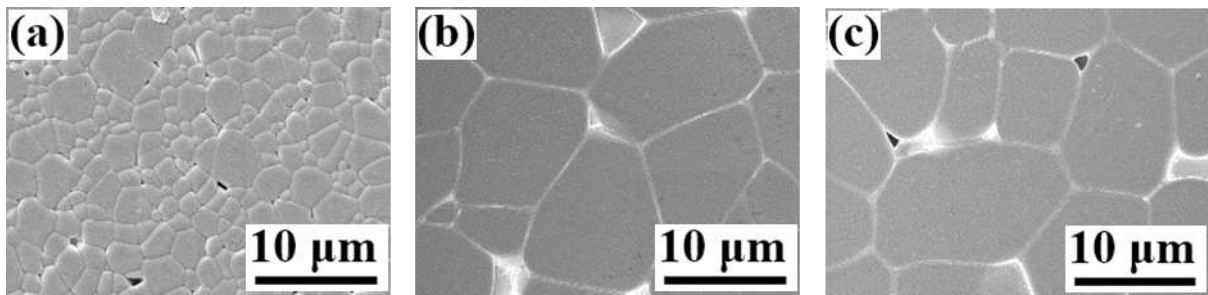

**Fig. S2.** SEM images of (a) NBT, (b) NBT-Fe-0.001, and (c) NBT-Fe-0.003.

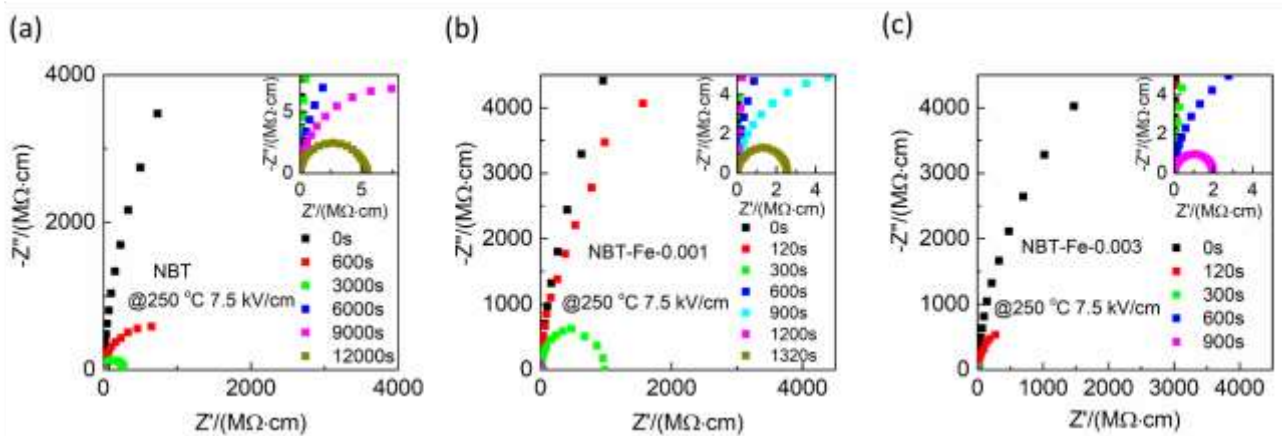

**Fig. S3.** Impedance spectra during different times of high field (7.5 kV/cm) application of (a) NBT, (b) NBT-Fe-0.001, and (c) NBT-Fe-0.003.

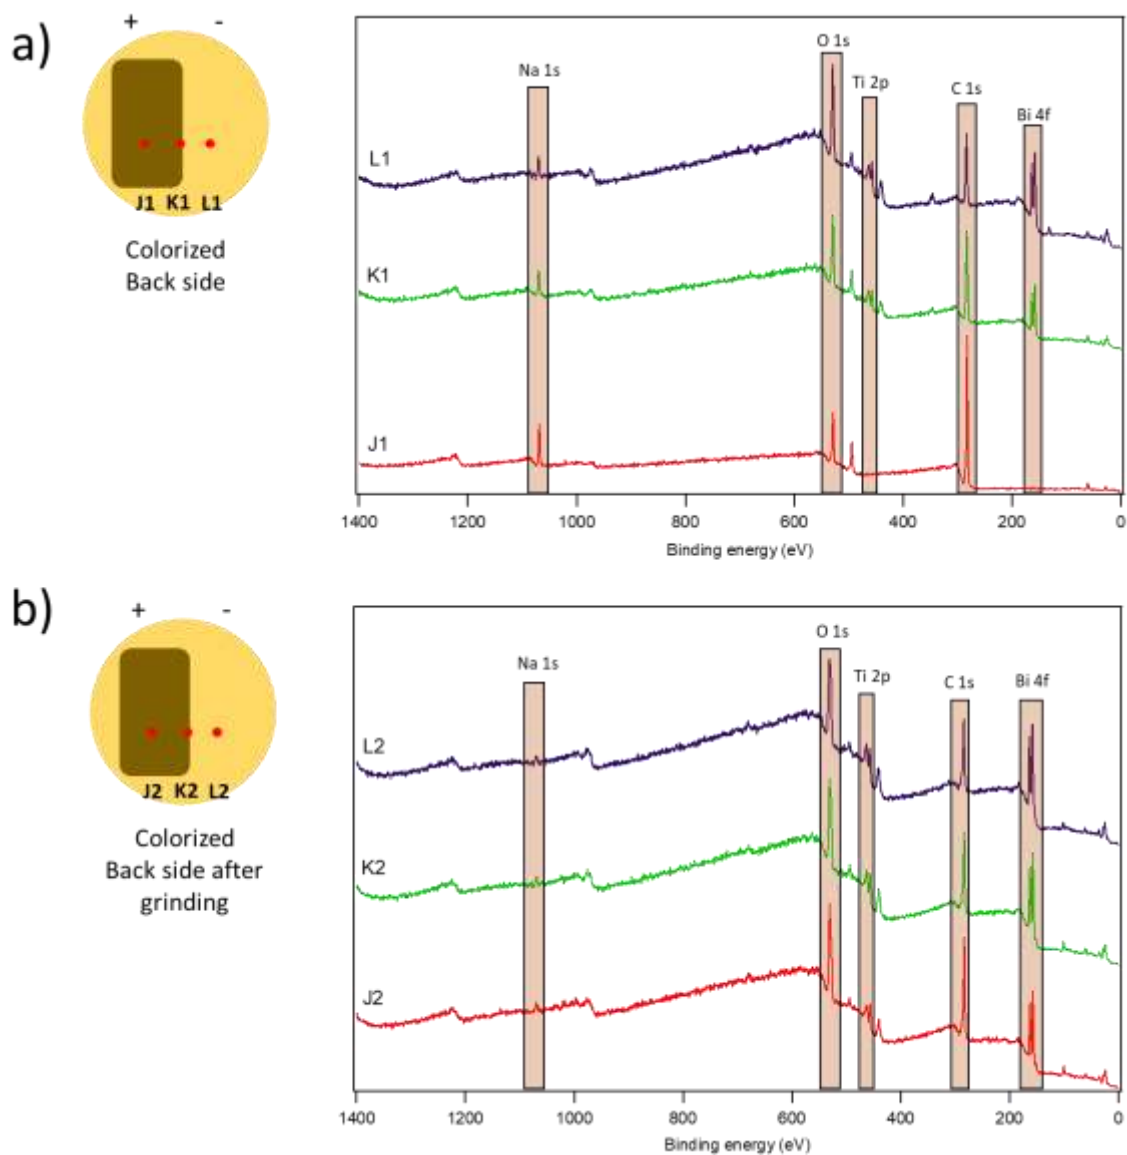

**Fig. S4.** Results from XPS measurements in different regions between the surface electrodes but measured from the backside of the sample. Colorization, which extends through the material, is schematically depicted on the left side. a) Positions L1, K1, J1 correspond to the respectively labeled spectra of the pristine back side. b) L2, K2, J2 correspond to the respectively labeled spectra of the back side after grinding of the surface.

1. T. Li, X. Lou, X. Ke, S. Cheng, S. Mi, X. Wang, J. Shi, X. Liu, G. Dong, H. Fan, Y. Wang and X. Tan, *Acta Materialia*, 2017, **128**, 337-344.
2. P. Ren, Y. Wang, A. I. Waidha, O. Clemens and L. K. V, *Journal of Materials Chemistry C*, 2020, **8**, 8613-8621.
